# Supplementary material for: Spatially Referenced Watershed Models for the Red-Assiniboine River Basin Using Bayesian and Frequentist Parameter Estimation Methods: A Critical Binational Comparison
Source: Research Square preprint supplement (doi:10.21203/rs.3.rs-8780165/v1), 2026-02-11
Supplement: Supplementary file 1 [file a951856ae07d8b2a840fc84b.docx]

Supplementary Information – Spatially Referenced Watershed Models for the Red-Assiniboine River Basin Using Bayesian and Frequentist Parameter Estimation Methods: A Critical Binational Comparison

a,b E. Agnes Blukacz-Richards (ORCID – 0000-0002-0014-3461)

a,b Felix Ouellet (ORCID – 0009-0004-7293-5048)

b Alex Neumann (ORCID – 0000-0003-1590-8516)

c Dale M. Robertson (ORCID – 0000-0001-6799-0596)

d Glenn A. Benoy (ORCID – 0000-0001-6530-7220)

b George Arhonditsis (ORCID – 0000-0001-5359-8737)

c David A. Saad (ORCID – 0000-0001-6559-6181)

a Environment and Climate Change Canada, Burlington, Ontario L7S 1A1, Canada

b Department of Physical & Environmental Sciences, University of Toronto, Toronto, Ontario M1C 1A4, Canada

c U.S. Geological Survey, Madison, Wisconsin 53726, USA

d International Joint Commission, Ottawa, Ontario K1P 6K6, Canada

*Corresponding authors: E-mail: Agnes.Richards@ec.gc.ca, Tel: +1 416-399-1841

E-mail: Felix.Ouellet@ec.gc.ca, Tel: +1 905-570-7489

E-mail: dzrobert@usgs.gov, Tel: +1 608-852-7551

E-mail: Alex.Gudimov@utoronto.ca, Tel: +1 416-876-1417

Appendix S1. SPARROW (Spatially Referenced Regression on Watershed Attributes) model

In this study, we used the standard SPARROW framework that separates the nutrient fate and transport within a watershed context into three conceptual processes, which ultimately describe the loading downstream: 1) nutrient export from different sources and land uses, 2) land-to-water delivery, and 3) nutrient attenuation rates during their transportation through streams and reservoirs 1. SPARROW estimates mean annual nutrient flux *Fi* (*µ* in natural logarithmic space) in a headwater sub-watershed *i* with the following governing equation:

|  | (3) |
| --- | --- |

where the subscripts *i* and *j* refer to monitored stations with tributary measurements and upstream reach catchments, respectively. For each water quality station *i*, mean annual TP load was estimated using Fluxmaster 2; for details see Jenkinson and Benoy 3. For each scenario calibrated using the Bayesian approach, the number of area sources *N* is denoted by the vector [*N1, N2,…, Nc*]. Scenarios 1, 2, and 3 have five sources: agricultural sources, forests/wetlands, stream channels, WWTPs, and Qu’Appelle River. For Scenarios 4, 7, and 5, one source was added in each case for a total of six sources, where agricultural sources are split into fertilizers and manure for Scenarios 4 and 7, and forests/wetlands were split into forests and wetlands for Scenario 5. For Scenario 6, one source was added, which was urban area, for a total of six sources. For Scenario 8, one source was added for a total of six sources, where agricultural sources were split into being located in Canada and the United States (U.S.). For Scenario 9, two sources are added for a total of seven sources, which corresponds to the combination of splits of Scenarios 7 and 8. [*J1, J2,…, Ji*]refers to the total number of stream reaches in monitored station catchments *i*; *εi* represents a random and normally distributed error term. is the export coefficient from a particular nutrient area source *n* (agriculture, agriculture fertilizer, agriculture manure, agriculture manure – Canada, stream channels…); *Sn* is a measurable quantity for the nutrient area source *n*, such as the area occupied by a specific land cover, or fertilizer and manure inputs to agricultural areas. represents the export coefficient for stream channels, where represents the length of the stream, selects only stream elements (not reservoirs), and is a boolean that selects stream flows between 0.03 m³/s and 0.21 m³/s. is the export coefficient of wastewater treatment plants, and is the wastewater treatment plant input load. is the point source for the Qu’Appelle River, expressed as a load.

The catchment transfer function accounts for the land-to-water delivery process at the catchment scale, which can be modulated by a suite of factors (or land-surface characteristics) associated with drainage, such as catchment slope, areal extent of wetlands, soil hydraulic conductivity, precipitation, and soil bulk density:

|  | (4) |
| --- | --- |

where *Z* refers to a measurable quantity of a factor*,* *α* represents the land-to-water delivery coefficient for a factor, which is represented by precipitation in our model.

The attenuation in connected reservoirs and lakes followed:

|  |  | (5) |
| --- | --- | --- |

Where instances of j included in multiplication were only applicable to reaches on the path of catchment j to water quality station, and where represents hydraulic load (annual outflow rate divided by the surface lake/reservoir area, m/yr); *kR* refers to the first order rate coefficient for net in-lake total phosphorus (TP) settling (m/yr).

Nutrient loading accumulation in nested station catchments is estimated by adding upstream loading 4. During typical model calibration, downstream loads are computed after all upstream simulated loads are replaced with their measured loads to prevent errors from propagating downstream 1. This may overestimate the “true” performance of the model compared to if the model completely simulated all of the loads 5,6. In this study in all Bayesian simulations, we used the “unconditioned” approach to estimate nutrient loading in downstream nested station catchments, , with simulated loading inputs from upstream station catchments:

|  | (6) |
| --- | --- |
|  |

where *Ui* is a number of upstream monitored station catchments, which flow into the station catchment *i*. is delivery fraction between the upstream and downstream water quality stations. and are referred to as in the manuscript.

Appendix S2. Calibration results in log scale.

Table S1. Model Fit RMSE, R², and DIC values for all scenarios. RMSE percent differences (representing improvement) for Scenarios 2-9 are calculated in comparison with Scenario 1.

| **Scenario** | **Description** | **RMSE (Calibrated)**  *Value Diff.* | | **RMSE (Predicted)**  *Value Diff.* | | **R² (Calibrated)**  *Value* | **R² (Predicted)**  *Value* | **DIC**  *Value* |
| --- | --- | --- | --- | --- | --- | --- | --- | --- |
| Scenario 1 | Benoy et al. 7 | 0.489 |  | 0.648 |  | 0.915 | 0.858 |  |
| Scenario 2 | Variability on WWTPs | 0.329 | 33% | 0.572 | 12% | 0.964 | 0.890 | 154.2 |
| Scenario 3a-MARB | Priors from MARB | 0.325 | 34% | 0.639 | 1% | 0.965 | 0.863 | 163.0 |
| Scenario 3b-MI | Priors from Bayesian SPARROW | 0.333 | 32% | 0.573 | 12% | 0.963 | 0.890 | 155.7 |
| Scenario 3c-Extr | Priors from Non-Bayesian SPARROW (Extremes) | 0.335 | 31% | 0.564 | 13% | 0.962 | 0.893 | 154.5 |
| Scenario 3d-FS | Priors from Non-SPARROW Field Studies | 0.331 | 32% | 0.577 | 11% | 0.963 | 0.888 | 154.3 |
| Scenario 4 | Split Fertilizers vs Manure | 0.331 | 32% | 0.556 | 14% | 0.964 | 0.897 | 152.5 |
| Scenario 5 | Split Forests vs Wetlands | 0.332 | 32% | 0.574 | 11% | 0.964 | 0.890 | 153.0 |
| Scenario 6 | Addition of Urban | 0.321 | 34% | 0.604 | 7% | 0.966 | 0.879 | 156.7 |
| Scenario 7 | Scenario 3d-FS & Scenario 4 | 0.333 | 32% | 0.562 | 13% | 0.963 | 0.895 | 153.5 |
| Scenario 8 | Scenario 3d-FS & Country Hierarchy (Agr. Inputs) | 0.346 | 29% | 0.568 | 12% | 0.960 | 0.893 | 156.0 |
| Scenario 9 | Scenario 7 & Country Hierarchy (Manure) | 0.347 | 29% | 0.555 | 14% | 0.960 | 0.899 | 151.7 |

| 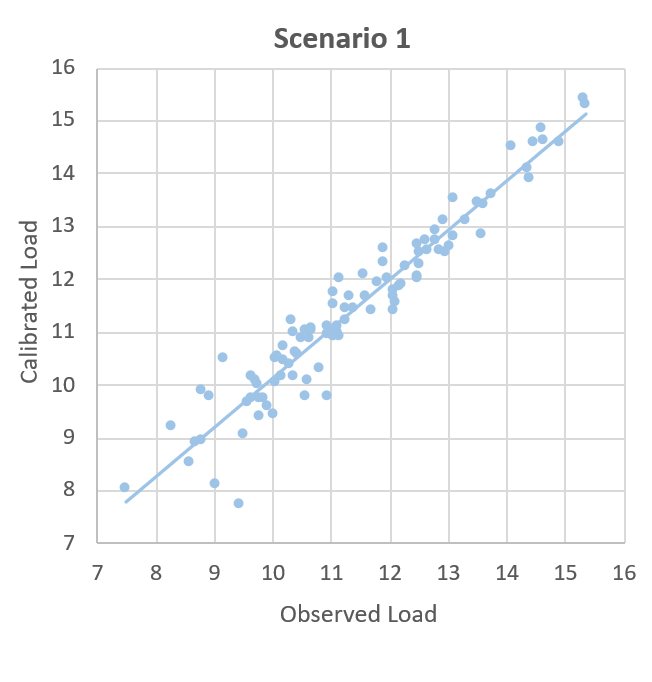 | 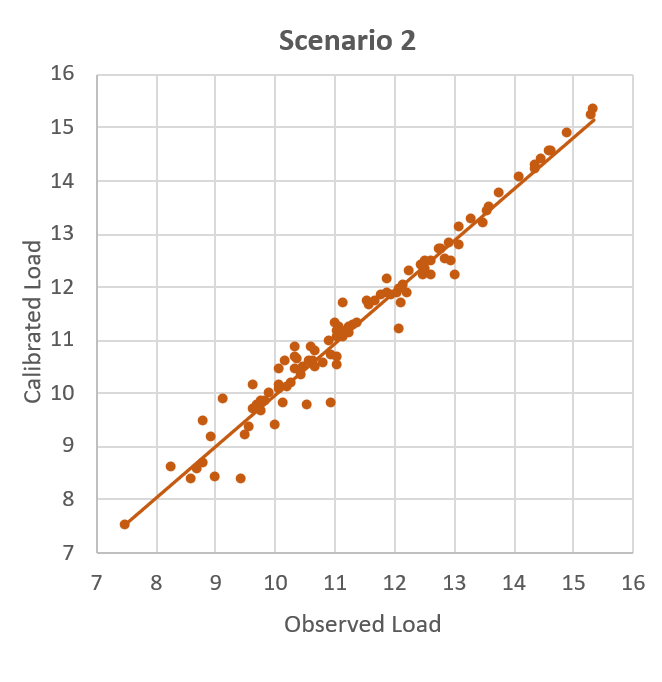 | 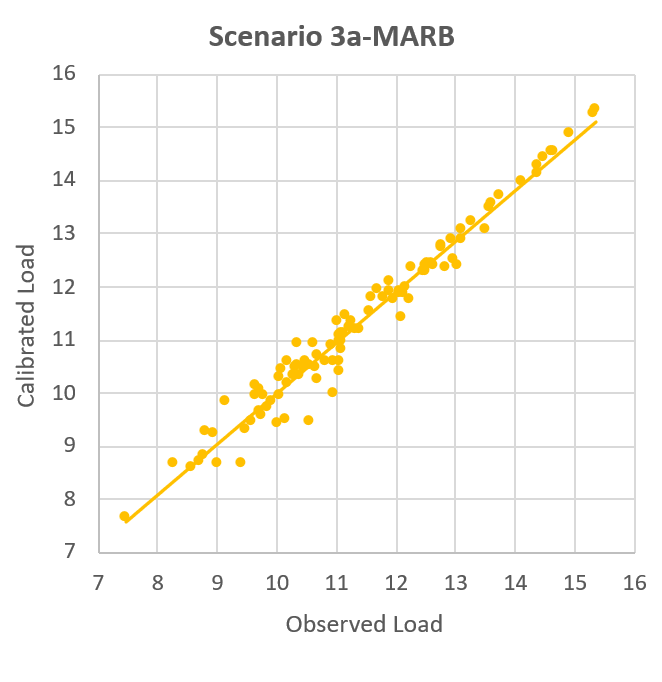 |
| --- | --- | --- |
| 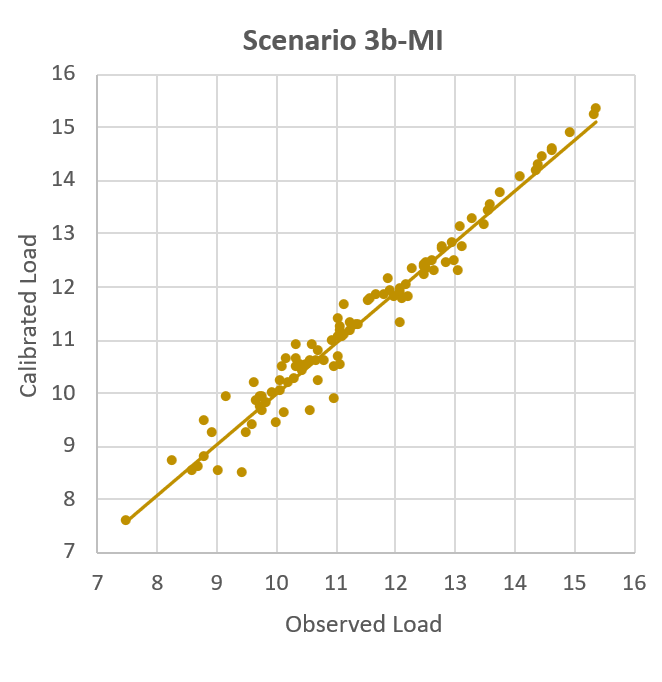 | 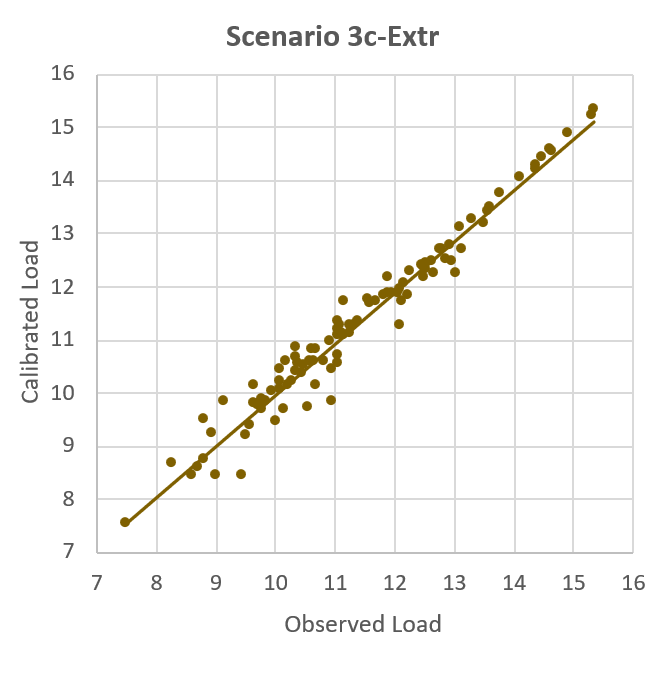 | 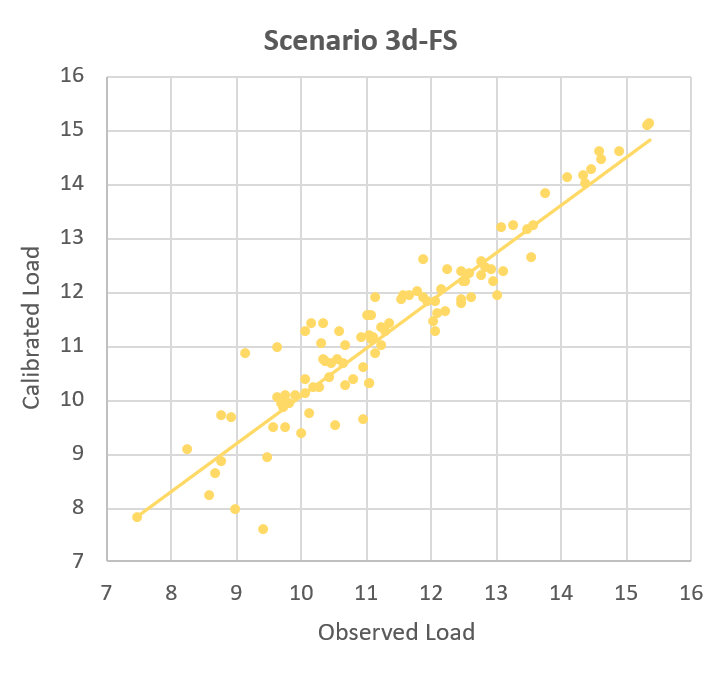 |
| 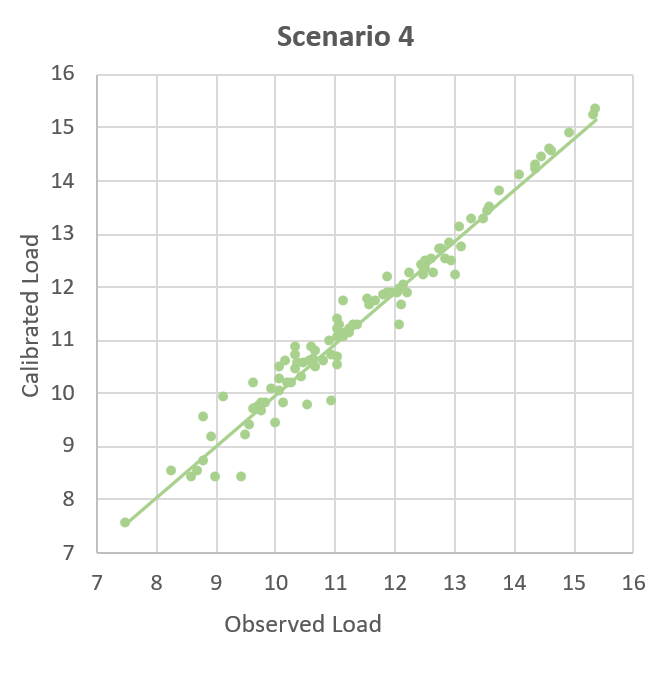 | 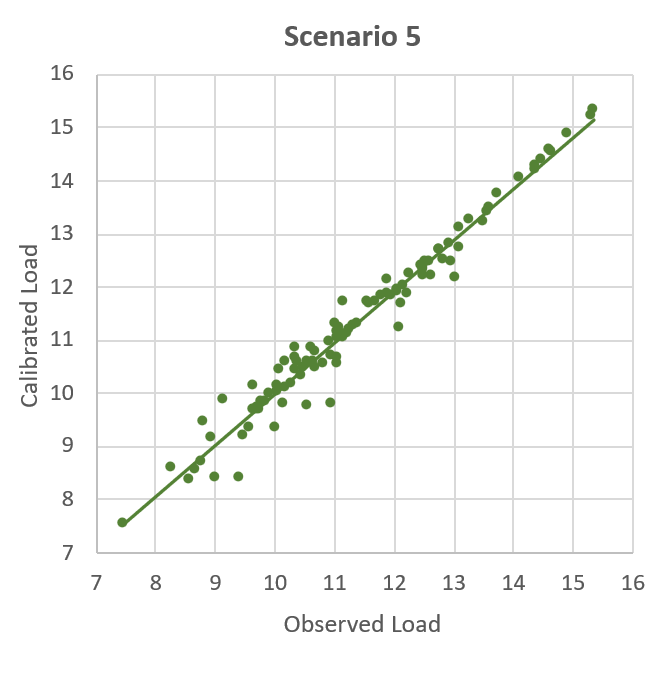 | 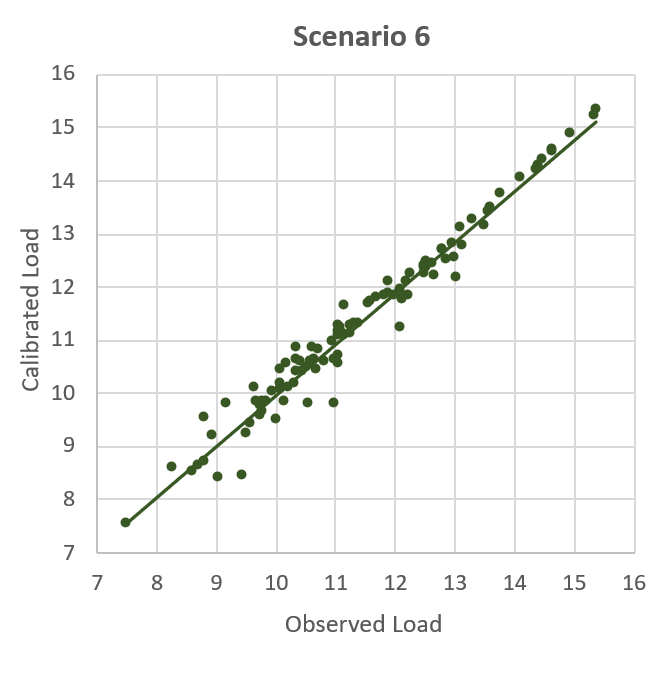 |
| 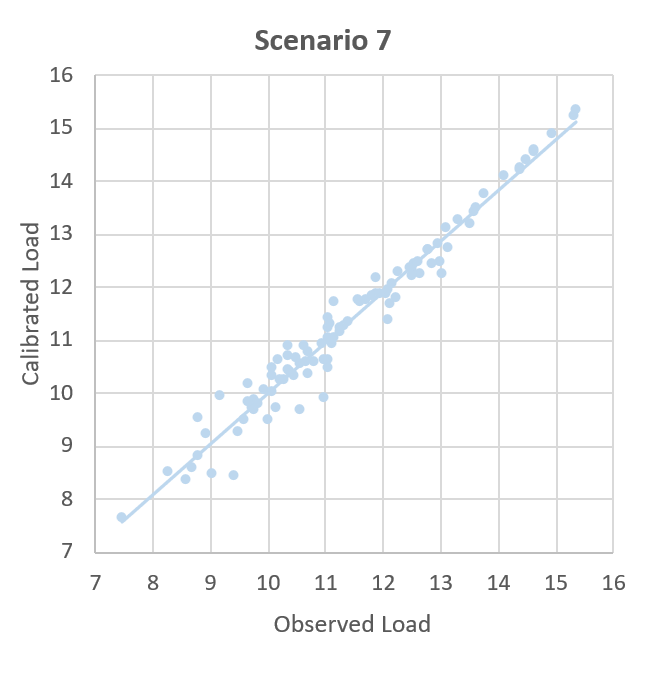 | 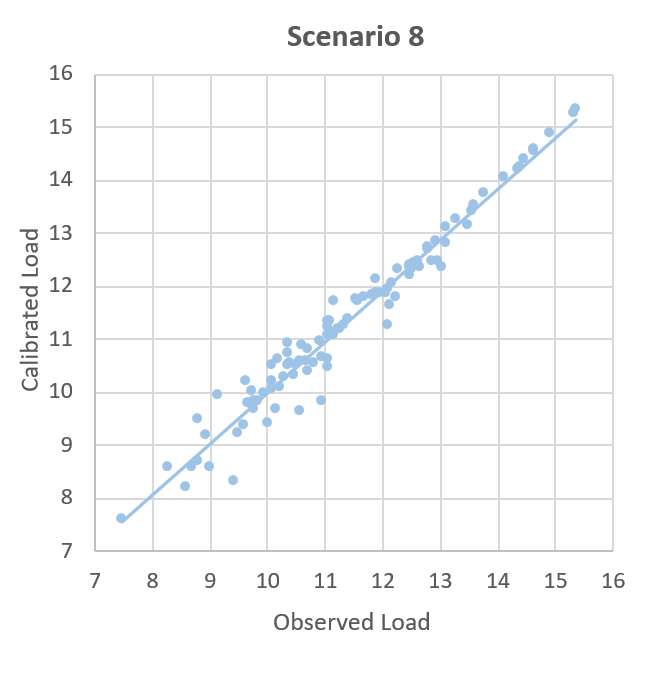 | 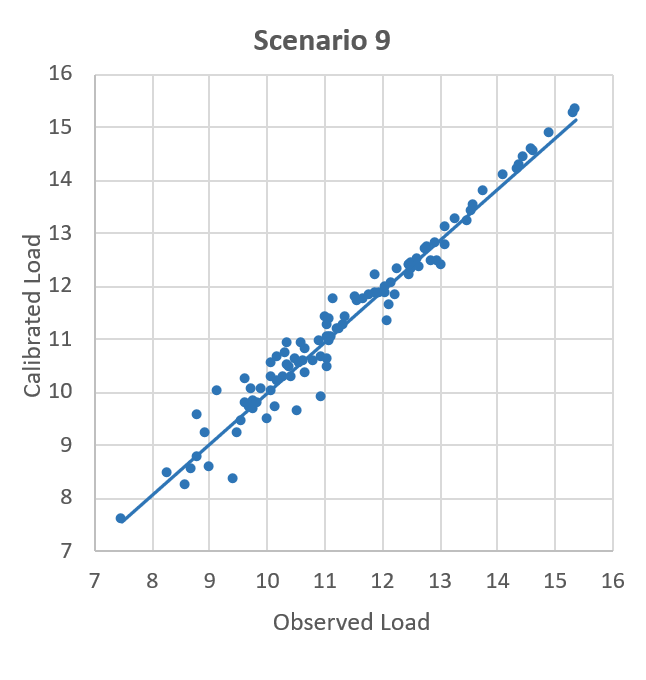 |

Figure S1. Calibration of loads – Benoy et al. 7 model (Scenario 1) and Bayesian main scenarios (Scenarios 2-9).

Table S2. Observed vs calibrated loads (kg/yr) for Scenario 1, and the four key scenarios.

| **SPARROW ID** | **Station Catchment ID** | **Observed Load** | **Scenario 1 Cal. Load** | **Scenario 2 Cal. Load** | **Scenario 3d-FS Cal. Load** | **Scenario 4 Cal. Load** | **Scenario 8 Cal. Load** |
| --- | --- | --- | --- | --- | --- | --- | --- |
| 62906 | 1 | 5,941 | 7,479 | 5,464 | 5,763 | 5,146 | 5,417 |
| 62792 | 2 | 34,123 | 39,728 | 32,600 | 33,910 | 30,850 | 31,430 |
| 62659 | 3 | 1,767 | 3,164 | 1,959 | 2,146 | 1,988 | 2,068 |
| 62617 | 4 | 68,782 | 55,371 | 64,020 | 65,720 | 63,390 | 64,050 |
| 62457 | 5 | 7,516 | 18,071 | 10,110 | 10,670 | 10,090 | 10,330 |
| 62437 | 6 | 17,478 | 17,570 | 19,420 | 20,110 | 19,120 | 19,230 |
| 62412 | 7 | 76,599 | 96,472 | 78,330 | 80,620 | 76,220 | 76,070 |
| 62081 | 8 | 182,359 | 105,039 | 123,900 | 128,900 | 121,100 | 119,400 |
| 62004 | 9 | 145,573 | 229,565 | 145,100 | 145,300 | 144,300 | 142,900 |
| 69251 | 10 | 264,024 | 166,661 | 236,600 | 236,000 | 237,100 | 244,000 |
| 69020 | 11 | 12,355 | 2,326 | 4,639 | 4,679 | 4,788 | 4,263 |
| 68621 | 12 | 308,015 | 280,137 | 214,100 | 216,400 | 215,700 | 236,200 |
| 68543 | 13 | 455,645 | 311,572 | 213,400 | 213,700 | 216,000 | 247,000 |
| 68143 | 14 | 13,247 | 8,743 | 10,110 | 11,030 | 10,200 | 10,470 |
| 67406 | 15 | 22,195 | 12,849 | 12,840 | 13,520 | 13,470 | 13,050 |
| 66912 | 16 | 38,052 | 17,653 | 18,760 | 17,430 | 18,770 | 16,770 |
| 66893 | 17 | 62,911 | 54,845 | 39,690 | 38,630 | 39,500 | 36,990 |
| 66888 | 18 | 62,587 | 63,135 | 45,580 | 43,940 | 44,740 | 42,530 |
| 66271 | 19 | 17,330 | 12,395 | 16,130 | 16,330 | 16,140 | 16,390 |
| 65229 | 20 | 16,570 | 24,128 | 17,690 | 17,770 | 17,220 | 17,740 |
| 65221 | 21 | 18,643 | 16,993 | 19,470 | 19,290 | 18,640 | 19,350 |
| 65193 | 22 | 23,490 | 23,372 | 23,920 | 23,930 | 23,440 | 23,990 |
| 65190 | 23 | 43,584 | 65,974 | 50,890 | 51,330 | 51,090 | 51,160 |
| 66157 | 24 | 82,302 | 117,586 | 81,260 | 80,650 | 82,520 | 80,430 |
| 65171 | 25 | 62,691 | 55,811 | 65,660 | 67,150 | 65,910 | 66,550 |
| 65041 | 26 | 133,100 | 157,344 | 142,700 | 143,900 | 142,100 | 142,300 |
| 65016 | 27 | 191,335 | 145,388 | 178,000 | 179,900 | 177,700 | 176,700 |
| 64915 | 28 | 271,161 | 219,535 | 233,900 | 238,000 | 234,000 | 232,200 |
| 64911 | 29 | 428,174 | 273,066 | 279,300 | 280,500 | 271,600 | 268,600 |
| 64574 | 30 | 6,598 | 19,908 | 13,840 | 13,350 | 15,130 | 13,800 |
| 64545 | 31 | 20,388 | 15,063 | 23,260 | 22,830 | 25,080 | 22,830 |
| 64540 | 32 | 49,244 | 30,305 | 40,400 | 39,870 | 41,500 | 39,450 |
| 63575 | 33 | 61,609 | 127,572 | 88,030 | 91,320 | 92,200 | 88,520 |
| 64248 | 34 | 57,284 | 17,988 | 19,290 | 20,370 | 20,130 | 19,450 |
| 63487 | 35 | 145,076 | 297,614 | 192,100 | 194,800 | 200,700 | 191,200 |
| 61081 | 36 | 38,648 | 61,979 | 41,160 | 39,910 | 40,300 | 40,670 |
| 61069 | 37 | 32,430 | 40,525 | 43,110 | 39,690 | 40,230 | 40,010 |
| 61002 | 38 | 66,065 | 59,692 | 76,840 | 67,130 | 69,370 | 69,490 |
| 60999 | 39 | 66,493 | 68,194 | 72,430 | 67,740 | 69,430 | 68,960 |
| 60271 | 40 | 172,389 | 134,984 | 149,600 | 145,300 | 149,700 | 141,600 |
| 60997 | 41 | 55,450 | 66,497 | 60,200 | 57,900 | 58,890 | 59,360 |
| 60206 | 42 | 274,716 | 268,804 | 265,100 | 256,500 | 262,800 | 258,400 |
| 60182 | 43 | 258,367 | 320,516 | 258,000 | 248,900 | 257,000 | 246,100 |
| 59638 | 44 | 202,322 | 151,052 | 150,400 | 141,800 | 149,900 | 139,300 |
| 59602 | 45 | 299,412 | 346,923 | 274,000 | 266,600 | 278,400 | 266,900 |
| 60174 | 46 | 379,031 | 281,631 | 294,000 | 275,800 | 292,600 | 277,300 |
| 59573 | 47 | 725,368 | 711,022 | 587,000 | 552,000 | 606,900 | 549,000 |
| 59570 | 48 | 486,020 | 752,227 | 508,600 | 499,600 | 516,500 | 499,200 |
| 59556 | 49 | 587,049 | 501,165 | 584,000 | 581,300 | 591,900 | 577,400 |
| 59077 | 50 | 156,005 | 166,673 | 146,600 | 145,300 | 148,500 | 148,100 |
| 59073 | 51 | 69,379 | 166,985 | 131,100 | 130,800 | 133,400 | 134,300 |
| 59052 | 52 | 938,444 | 826,348 | 975,200 | 977,700 | 998,300 | 966,100 |
| 58159 | 53 | 30,745 | 76,665 | 45,380 | 45,040 | 46,180 | 46,760 |
| 57848 | 54 | 175,504 | 120,797 | 159,900 | 160,500 | 160,400 | 159,100 |
| 57847 | 55 | 103,419 | 178,404 | 135,400 | 133,300 | 139,200 | 136,000 |
| 57839 | 56 | 1,753,564 | 1,104,999 | 1,609,000 | 1,595,000 | 1,615,000 | 1,585,000 |
| 57537 | 57 | 6,529 | 7,783 | 6,281 | 6,793 | 6,537 | 6,457 |
| 57291 | 58 | 176,498 | 89,971 | 79,880 | 87,170 | 85,940 | 81,320 |
| 57257 | 59 | 1,326,990 | 2,039,085 | 1,371,000 | 1,367,000 | 1,433,000 | 1,346,000 |
| 57168 | 60 | 1,724,903 | 1,366,327 | 1,528,000 | 1,529,000 | 1,540,000 | 1,490,000 |
| 57167 | 61 | 1,917,699 | 2,157,984 | 1,851,000 | 1,848,000 | 1,864,000 | 1,825,000 |
| 56869 | 62 | 14,361 | 16,280 | 12,410 | 13,460 | 13,000 | 12,570 |
| 56847 | 63 | 23,459 | 37,063 | 27,360 | 30,220 | 29,980 | 28,550 |
| 56540 | 64 | 26,822 | 35,651 | 26,310 | 27,950 | 28,510 | 25,830 |
| 55756 | 65 | 35,812 | 53,636 | 38,270 | 41,700 | 41,780 | 39,260 |
| 55305 | 66 | 2,255,472 | 2,254,632 | 2,128,000 | 2,140,000 | 2,154,000 | 2,091,000 |
| 54198 | 67 | 25,247 | 25,818 | 19,630 | 18,330 | 19,650 | 17,310 |
| 54062 | 68 | 42,048 | 53,317 | 43,480 | 42,880 | 43,530 | 41,880 |
| 53575 | 69 | 2,209,305 | 2,869,000 | 2,198,000 | 2,200,000 | 2,249,000 | 2,193,000 |
| 53560 | 70 | 3,005,922 | 2,212,409 | 2,945,000 | 2,928,000 | 2,938,000 | 2,920,000 |
| 51912 | 71 | 87,491 | 96,641 | 85,100 | 89,710 | 84,330 | 91,320 |
| 51726 | 72 | 62,884 | 101,196 | 73,350 | 76,900 | 74,160 | 78,530 |
| 51724 | 73 | 64,419 | 63,199 | 79,760 | 83,320 | 81,340 | 86,510 |
| 50647 | 74 | 8,184 | 3,360 | 4,703 | 5,115 | 4,632 | 5,667 |
| 48920 | 75 | 16,743 | 22,268 | 17,750 | 19,030 | 17,990 | 24,250 |
| 34261 | 76 | 75,773 | 74,338 | 68,830 | 71,360 | 69,210 | 74,230 |
| 32553 | 77 | 43,516 | 63,545 | 38,800 | 33,420 | 38,120 | 33,700 |
| 31396 | 78 | 57,026 | 57,692 | 48,440 | 44,420 | 48,610 | 46,090 |
| 28909 | 79 | 263,378 | 173,859 | 212,000 | 208,000 | 207,700 | 208,700 |
| 22936 | 80 | 29,210 | 33,224 | 27,460 | 28,650 | 27,470 | 30,110 |
| 22710 | 81 | 350,829 | 348,687 | 327,700 | 329,200 | 327,600 | 331,600 |
| 22261 | 82 | 492,785 | 377,384 | 362,500 | 358,000 | 354,300 | 367,900 |
| 21854 | 83 | 414,766 | 506,285 | 374,300 | 375,700 | 371,400 | 381,000 |
| 17386 | 84 | 15,405 | 25,739 | 17,310 | 20,360 | 16,970 | 18,960 |
| 10445 | 85 | 30,971 | 60,818 | 35,230 | 35,650 | 35,580 | 37,660 |
| 10115 | 86 | 9,375 | 37,022 | 20,390 | 20,330 | 21,560 | 21,900 |
| 9196 | 87 | 5,349 | 5,116 | 4,557 | 4,431 | 4,631 | 3,866 |
| 9010 | 88 | 15,242 | 16,962 | 26,590 | 26,450 | 27,590 | 28,040 |
| 8542 | 89 | 23,767 | 38,482 | 35,150 | 35,870 | 36,400 | 36,720 |
| 8530 | 90 | 40,308 | 23,915 | 53,140 | 54,010 | 53,790 | 55,020 |
| 8035 | 91 | 3,856 | 10,236 | 5,640 | 5,777 | 5,215 | 5,461 |
| 7994 | 92 | 26,240 | 46,338 | 41,180 | 41,870 | 41,890 | 43,060 |
| 7985 | 93 | 30,997 | 26,666 | 53,910 | 55,920 | 55,250 | 56,490 |
| 7382 | 94 | 118,435 | 90,386 | 132,000 | 140,400 | 129,500 | 136,500 |
| 7292 | 95 | 106,587 | 120,720 | 121,100 | 128,300 | 121,200 | 124,900 |
| 1964 | 96 | 210,785 | 212,498 | 218,500 | 219,700 | 215,800 | 226,500 |
| 807 | 97 | 802,425 | 689,216 | 741,700 | 745,100 | 743,200 | 765,000 |
| 702 | 98 | 353,610 | 410,826 | 332,500 | 336,400 | 331,900 | 344,600 |
| 433 | 99 | 775,108 | 378,638 | 680,100 | 681,200 | 666,400 | 685,400 |
| 222 | 100 | 4,505,002 | 4,974,967 | 4,217,000 | 4,243,000 | 4,277,000 | 4,333,000 |
| 104 | 101 | 4,649,398 | 4,547,900 | 4,557,000 | 4,574,000 | 4,566,000 | 4,598,000 |

Appendix S3. Priors vs posteriors.

Table S3. Characteristics of Parameters prior probability distributions for SPARROW parameters in Red-Assiniboine River Basin (RARB) with descriptions, units, means, standard deviations (S.D.), and interpretations. Interpretation column shows that 90% of the probability lies between the two values shown.

| **Parameters/ Priors** | | **Units** | **Mean** | **S.D.** | | **Interpretation** | |
| --- | --- | --- | --- | --- | --- | --- | --- |
| *Sources (βFM): Fertilizers and Manure* | | | | | | | |
| Scenario 1 7 | Fraction | | 0.011 | | 0.004 | | 0.005 - 0.018 |
| Scenario 2 7 | Fraction | | 0.011 | | 0.004 | | 0.005 - 0.018 |
| Scenario 3a-MARB 8 | Fraction | | 0.027 | | 0.005 | | 0.019 - 0.035 |
| Scenario 3b-MI† 4,7–9 | Fraction | | 0.026 | | 0.005 | | 0.018 - 0.034 |
| Scenario 3c-Extr‡ 4,7–9 | Fraction | | 0.050 | | 0.050 | | 0.003 - 0.040 |
| Scenario 3d-FS§ 10,11 | Fraction | | 0.050 | | 0.030 | | 0.011 - 0.100 |
| Scenario 4-Fertilizers 7  -Manure 7 | Fraction  Fraction | | 0.011  0.011 | | 0.004  0.004 | | 0.005 - 0.018  0.005 - 0.018 |
| Scenario 5 7 | Fraction | | 0.011 | | 0.004 | | 0.005 - 0.018 |
| Scenario 6 7 | Fraction | | 0.011 | | 0.004 | | 0.005 - 0.018 |
| Scenario 7-Fertilizers§ 10,11  -Manure§ 10,11 | Fraction  Fraction | | 0.050  0.050 | | 0.030  0.030 | | 0.011 - 0.100  0.011 - 0.100 |
| Scenario 8 -Canada§ 10,11  -U.S.§ 10,11 | Fraction  Fraction | | 0.050  0.050 | | 0.030  0.030 | | 0.011 - 0.100  0.011 - 0.100 |
| Scenario 9-Fertilizers§ 10,11  -Manure-Canada§ 10,11  -Manure-U.S.§ 10,11 | Fraction  Fraction  Fraction | | 0.050  0.050  0.050 | | 0.030  0.030  0.030 | | 0.011 - 0.100  0.011 - 0.100  0.011 - 0.100 |

| *Sources (βFW): Forests and Wetlands* | | | | |
| --- | --- | --- | --- | --- |
| Scenario 1 7 | kg/km²/yr | 6.02 | 3.2 | 1 - 11 |
| Scenario 2 7 | kg/km²/yr | 6.02 | 3.2 | 1 - 11 |
| Scenario 3a-MARB 8 | kg/km²/yr | 4.22 | 1.3 | 2 - 6 |
| Scenario 3b-MI 12 | kg/km²/yr | 6.00 | 4.3 | 1 - 13 |
| Scenario 3c-Extr‡ 7,8 | kg/km²/yr | 10.00 | 10.0 | 2 - 27 |
| Scenario 3d-FS 13 | kg/km²/yr | 7.18 | 3.8 | 2 - 14 |
| Scenario 4 7 | kg/km²/yr | 6.02 | 3.2 | 1 - 11 |
| Scenario 5-Forests 7  -Wetlands 7 | kg/km²/yr  kg/km²/yr | 6.02  6.02 | 3.2  3.2 | 1 - 11  1 - 11 |
| Scenario 6 7 | kg/km²/yr | 6.02 | 3.2 | 1 - 11 |
| Scenario 7 13 | kg/km²/yr | 7.18 | 3.8 | 2 - 14 |
| Scenario 8 13 | kg/km²/yr | 7.18 | 3.8 | 2 - 14 |
| Scenario 9 13 | kg/km²/yr | 7.18 | 3.8 | 2 - 14 |

| *Sources (βU): Urban Areas including cottages and roads* | | | | |
| --- | --- | --- | --- | --- |
| Scenario 6 8 | kg/km²/yr | 103 | 23 | 65 - 141 |

| **Parameters/ Priors** | **Units** | **Mean** | | **S.D.** | | **Interpretation** |
| --- | --- | --- | --- | --- | --- | --- |
| *Sources (βSC): Stream Channels* | | | | | | |
| Scenario 1 7 | kg/m/yr | | 0.070 | | 0.04 | 0.02 - 0.14 |
| Scenario 2 7 | kg/m/yr | | 0.070 | | 0.04 | 0.02 - 0.14 |
| Scenario 3a-MARB 8 | kg/m/yr | | 0.093 | | 0.02 | 0.06 - 0.13 |
| Scenario 3b-MI† 7,8 | kg/m/yr | | 0.081 | | 0.03 | 0.03 - 0.13 |
| Scenario 3c-Extr‡ 7,8 | kg/m/yr | | 0.200 | | 0.20 | 0.03 - 0.54 |
| Scenario 3d-FS§ 7,8 | kg/m/yr | | 0.082 | | 0.02 | 0.05 - 0.11 |
| Scenario 4 7 | kg/m/yr | | 0.070 | | 0.04 | 0.02 - 0.14 |
| Scenario 5 7 | kg/m/yr | | 0.070 | | 0.04 | 0.02 - 0.14 |
| Scenario 6 7 | kg/m/yr | | 0.070 | | 0.04 | 0.02 - 0.14 |
| Scenario 7§ 7,8 | kg/m/yr | | 0.082 | | 0.02 | 0.05 - 0.11 |
| Scenario 8§ 7,8 | kg/m/yr | | 0.082 | | 0.02 | 0.05 - 0.11 |
| Scenario 9§ 7,8 | kg/m/yr | | 0.082 | | 0.02 | 0.05 - 0.11 |

| *Sources (βPT): Wastewater Treatment Plants* | | | | |
| --- | --- | --- | --- | --- |
| Scenario 1 7 | Fraction | 1.000 | – | – |
| Scenario 2 7 | Fraction | 1.000 | 0.06 | 0.9 - 1.1 |
| Scenario 3a-MARB 8 | Fraction | 1.000 | 0.19 | 0.7 - 1.4 |
| Scenario 3b-MI 14,15 | Fraction | 1.000 | 0.30 | 0.5 - 1.5 |
| Scenario 3c-Extr 7 | Fraction | 1.000 | 1.00 | 0.2 - 2.7 |
| Scenario 3d-FS 7 | Fraction | 1.000 | 0.06 | 0.9 - 1.1 |
| Scenario 4 7 | Fraction | 1.000 | 0.06 | 0.9 - 1.1 |
| Scenario 5 7 | Fraction | 1.000 | 0.06 | 0.9 - 1.1 |
| Scenario 6 7 | Fraction | 1.000 | 0.06 | 0.9 - 1.1 |
| Scenario 7 7 | Fraction | 1.000 | 0.06 | 0.9 - 1.1 |
| Scenario 8 7 | Fraction | 1.000 | 0.06 | 0.9 - 1.1 |
| Scenario 9 7 | Fraction | 1.000 | 0.06 | 0.9 - 1.1 |

| *Land-to-water delivery (aPPT)* | | | | |
| --- | --- | --- | --- | --- |
| Scenario 1 7 | mm/yr | 0.0093 | 0.002 | 0.006 - 0.013 |
| Scenario 2 7 | mm/yr | 0.0093 | 0.002 | 0.006 - 0.013 |
| Scenario 3a-MARB 8 | mm/yr | 0.0020 | 0.001 | 0.001 - 0.004 |
| Scenario 3b-MI† 7,8 | mm/yr | 0.0060 | 0.002 | 0.003 - 0.009 |
| Scenario 3c-Extr‡ 7,8 | mm/yr | 0.0100 | 0.010 | 0.002 - 0.027 |
| Scenario 3d-FS§ 7,8 | mm/yr | 0.0055 | 0.003 | 0.001 - 0.010 |
| Scenario 4 7 | mm/yr | 0.0093 | 0.002 | 0.006 - 0.013 |
| Scenario 5 7 | mm/yr | 0.0093 | 0.002 | 0.006 - 0.013 |
| Scenario 6 7 | mm/yr | 0.0093 | 0.002 | 0.006 - 0.013 |
| Scenario 7§ 7,8 | mm/yr | 0.0055 | 0.003 | 0.001 - 0.010 |
| Scenario 8§ 7,8 | mm/yr | 0.0055 | 0.003 | 0.001 - 0.010 |
| Scenario 9§ 7,8 | mm/yr | 0.0055 | 0.003 | 0.001 - 0.010 |

| *Losses in reservoirs (kR)* | | | | |
| --- | --- | --- | --- | --- |
| Scenario 1 7 | m/yr | 5.73 | 2.6 | 2 - 10 |
| Scenario 2 7 | m/yr | 5.73 | 2.6 | 2 - 10 |
| Scenario 3a-MARB 8 | m/yr | 16.77 | 3.3 | 11 - 22 |
| Scenario 3b-MI 12 | m/yr | 12.84 | 4.8 | 5 - 21 |
| Scenario 3c-Extr‡ 4,7–9 | m/yr | 20.00 | 20.0 | 3 - 54 |
| Scenario 3d-FS§ 4,7–9,16 | m/yr | 8.42 | 4.3 | 2 - 16 |
| Scenario 4 7 | m/yr | 5.73 | 2.6 | 2 - 10 |
| Scenario 5 7 | m/yr | 5.73 | 2.6 | 2 - 10 |
| Scenario 6 7 | m/yr | 5.73 | 2.6 | 2 - 10 |
| Scenario 7§ 4,7–9,16 | m/yr | 8.42 | 4.3 | 2 - 16 |
| Scenario 8§ 4,7–9,16 | m/yr | 8.42 | 4.3 | 2 - 16 |
| Scenario 9§ 4,7–9,16 | m/yr | 8.42 | 4.3 | 2 - 16 |

Binational Great Lakes 4; Binational RARB 7; Mississippi/Atchafalaya (MARB) 8; MRB3 (USA Laurentian Great Lakes) 9; Northern Great Plains streams 10; MANAGE DB (JAWRA) 11; Bay of Quinte 12; Manitoba streams 13; GeorgianBay 14,15; Northern Great Plains surface waters 16; § Based on distributions from published values; † Average of published values; ‡ Extreme values based on published values.

Table S4. Posteriors: Comparison of the posterior SPARROW parameter estimates for Red-Assiniboine River Basin (RARB).

| **Parameters/ Posteriors** | | **Units** | **Mean** | | **S.D.** | | **Interpretation** | |
| --- | --- | --- | --- | --- | --- | --- | --- | --- |
| *Sources (βFM): Fertilizers and Manure* | | | | | | | | % of TP is exported |
| Scenario 1 | Fraction | | | 0.011 | | 0.004 | | 1.1% |
| Scenario 2 | Fraction | | | 0.010 | | 0.001 | | 1.0% |
| Scenario 3a-MARB | Fraction | | | 0.015 | | 0.002 | | 1.5% |
| Scenario 3b-MI | Fraction | | | 0.013 | | 0.002 | | 1.3% |
| Scenario 3c-Extr | Fraction | | | 0.012 | | 0.002 | | 1.2% |
| Scenario 3d-FS | Fraction | | | 0.009 | | 0.001 | | 0.9% |
| Scenario 4-Fertilizers  -Manure | Fraction  Fraction | | | 0.012  0.005 | | 0.002  0.003 | | 1.2%  0.5% |
| Scenario 5 | Fraction | | | 0.010 | | 0.002 | | 1.0% |
| Scenario 6 | Fraction | | | 0.008 | | 0.002 | | 0.8% |
| Scenario 7-Fertilizers  -Manure | Fraction  Fraction | | | 0.011  0.003 | | 0.002  0.003 | | 1.1%  0.3% |
| Scenario 8 -Canada  -U.S. | Fraction  Fraction | | | 0.014  0.008 | | 0.003  0.002 | | 1.4%  0.8% |
| Scenario 9-Fertilizers  -Manure-Canada  -Manure-U.S. | Fraction  Fraction  Fraction | | | 0.010  0.035  0.002 | | 0.002  0.020  0.002 | | 1.0%  3.5%  0.2% |

| *Sources (βFW): Forests and Wetlands* | | | | kg of TP is exported per km2 per year |
| --- | --- | --- | --- | --- |
| Scenario 1 | kg/km²/yr | 6.02 | 3.2 | 6 |
| Scenario 2 | kg/km²/yr | 6.65 | 1.8 | 7 |
| Scenario 3a-MARB | kg/km²/yr | 5.56 | 1.0 | 6 |
| Scenario 3b-MI | kg/km²/yr | 8.39 | 2.2 | 8 |
| Scenario 3c-Extr | kg/km²/yr | 8.86 | 2.8 | 9 |
| Scenario 3d-FS | kg/km²/yr | 7.31 | 2.0 | 7 |
| Scenario 4 | kg/km²/yr | 6.83 | 1.7 | 7 |
| Scenario 5-Forests  -Wetlands | kg/km²/yr  kg/km²/yr | 5.40  7.14 | 2.7  2.0 | 5  7 |
| Scenario 6 | kg/km²/yr | 6.35 | 1.9 | 6 |
| Scenario 7 | kg/km²/yr | 7.33 | 1.9 | 7 |
| Scenario 8 | kg/km²/yr | 6.52 | 1.9 | 7 |
| Scenario 9 | kg/km²/yr | 6.63 | 1.8 | 7 |

| *Sources (βU): Urban Areas including cottages and roads* | | | | kg of TP is exported per km2 per year |
| --- | --- | --- | --- | --- |
| Scenario 6 | kg/km²/yr | 65 | 22 | 65 |

| **Parameters/ Posteriors** | | **Units** | **Mean** | | **S.D.** | | **Interpretation** | |
| --- | --- | --- | --- | --- | --- | --- | --- | --- |
| *Sources (βSC): Stream Channels* | | | | | | | | TP export per linear unit of stream per year |
| Scenario 1 | kg/m/yr | | | 0.070 | | 0.04 | | 0.07 |
| Scenario 2 | kg/m/yr | | | 0.030 | | 0.02 | | 0.03 |
| Scenario 3a-MARB | kg/m/yr | | | 0.067 | | 0.02 | | 0.07 |
| Scenario 3b-MI | kg/m/yr | | | 0.029 | | 0.02 | | 0.03 |
| Scenario 3c-Extr | kg/m/yr | | | 0.029 | | 0.02 | | 0.03 |
| Scenario 3d-FS | kg/m/yr | | | 0.062 | | 0.02 | | 0.06 |
| Scenario 4 | kg/m/yr | | | 0.023 | | 0.02 | | 0.02 |
| Scenario 5 | kg/m/yr | | | 0.031 | | 0.02 | | 0.03 |
| Scenario 6 | kg/m/yr | | | 0.027 | | 0.02 | | 0.03 |
| Scenario 7 | kg/m/yr | | | 0.056 | | 0.02 | | 0.06 |
| Scenario 8 | kg/m/yr | | | 0.059 | | 0.02 | | 0.06 |
| Scenario 9 | kg/m/yr | | | 0.053 | | 0.01 | | 0.05 |

| *Sources (βPT): Wastewater Treatment Plants* | | | | Percentage (%) of TP from WWTP is exported |
| --- | --- | --- | --- | --- |
| Scenario 1 | Fraction | 1.000 | – | 100.00% |
| Scenario 2 | Fraction | 0.992 | 0.06 | 99.19% |
| Scenario 3a-MARB | Fraction | 0.997 | 0.20 | 99.70% |
| Scenario 3b-MI | Fraction | 0.791 | 0.29 | 79.06% |
| Scenario 3c-Extr | Fraction | 0.496 | 0.40 | 49.61% |
| Scenario 3d-FS | Fraction | 0.992 | 0.06 | 99.16% |
| Scenario 4 | Fraction | 0.991 | 0.06 | 99.12% |
| Scenario 5 | Fraction | 0.990 | 0.06 | 99.02% |
| Scenario 6 | Fraction | 0.991 | 0.06 | 99.06% |
| Scenario 7 | Fraction | 0.990 | 0.06 | 99.00% |
| Scenario 8 | Fraction | 0.990 | 0.06 | 99.02% |
| Scenario 9 | Fraction | 0.988 | 0.06 | 98.77% |

| *Land-to-water delivery (aPPT)* | | | | Precipitation enhanced TP delivery by % |
| --- | --- | --- | --- | --- |
| Scenario 1 | mm/yr | 0.0093 | 0.002 | 44% |
| Scenario 2 | mm/yr | 0.0091 | 0.001 | 42% |
| Scenario 3a-MARB | mm/yr | 0.0052 | 0.001 | 14% |
| Scenario 3b-MI | mm/yr | 0.0073 | 0.001 | 27% |
| Scenario 3c-Extr | mm/yr | 0.0084 | 0.001 | 36% |
| Scenario 3d-FS | mm/yr | 0.0090 | 0.001 | 41% |
| Scenario 4 | mm/yr | 0.0093 | 0.001 | 44% |
| Scenario 5 | mm/yr | 0.0092 | 0.001 | 43% |
| Scenario 6 | mm/yr | 0.0083 | 0.001 | 35% |
| Scenario 7 | mm/yr | 0.0093 | 0.001 | 44% |
| Scenario 8 | mm/yr | 0.0102 | 0.001 | 54% |
| Scenario 9 | mm/yr | 0.0103 | 0.001 | 56% |

| *Losses in reservoirs (kR)* | | | | TP settles at about X m/year |
| --- | --- | --- | --- | --- |
| Scenario 1 | m/yr | 5.73 | 2.6 | 6 |
| Scenario 2 | m/yr | 8.42 | 1.9 | 8 |
| Scenario 3a-MARB | m/yr | 18.48 | 2.7 | 18 |
| Scenario 3b-MI | m/yr | 15.10 | 3.3 | 15 |
| Scenario 3c-Extr | m/yr | 15.06 | 5.4 | 15 |
| Scenario 3d-FS | m/yr | 12.22 | 2.8 | 12 |
| Scenario 4 | m/yr | 8.40 | 1.9 | 8 |
| Scenario 5 | m/yr | 8.26 | 1.9 | 8 |
| Scenario 6 | m/yr | 8.30 | 1.9 | 8 |
| Scenario 7 | m/yr | 12.16 | 2.8 | 12 |
| Scenario 8 | m/yr | 13.33 | 3.0 | 13 |
| Scenario 9 | m/yr | 13.04 | 2.9 | 13 |


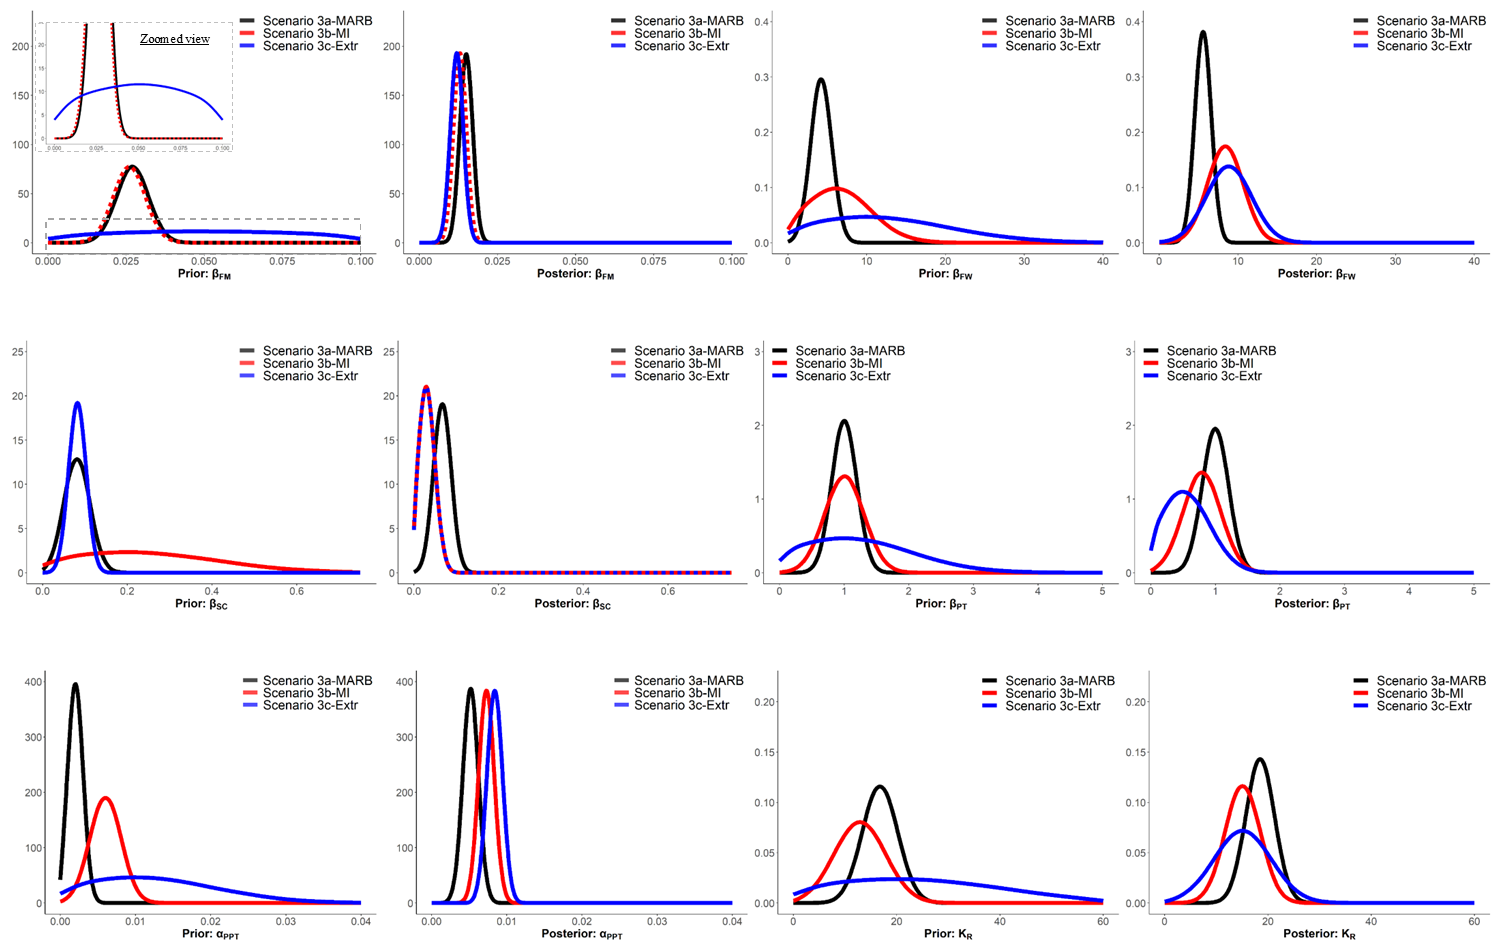


Figure S2. Probability density plots for parameter priors and posteriors of Scenarios 3a-MARB, 3b-MI, and 3c-Extr.


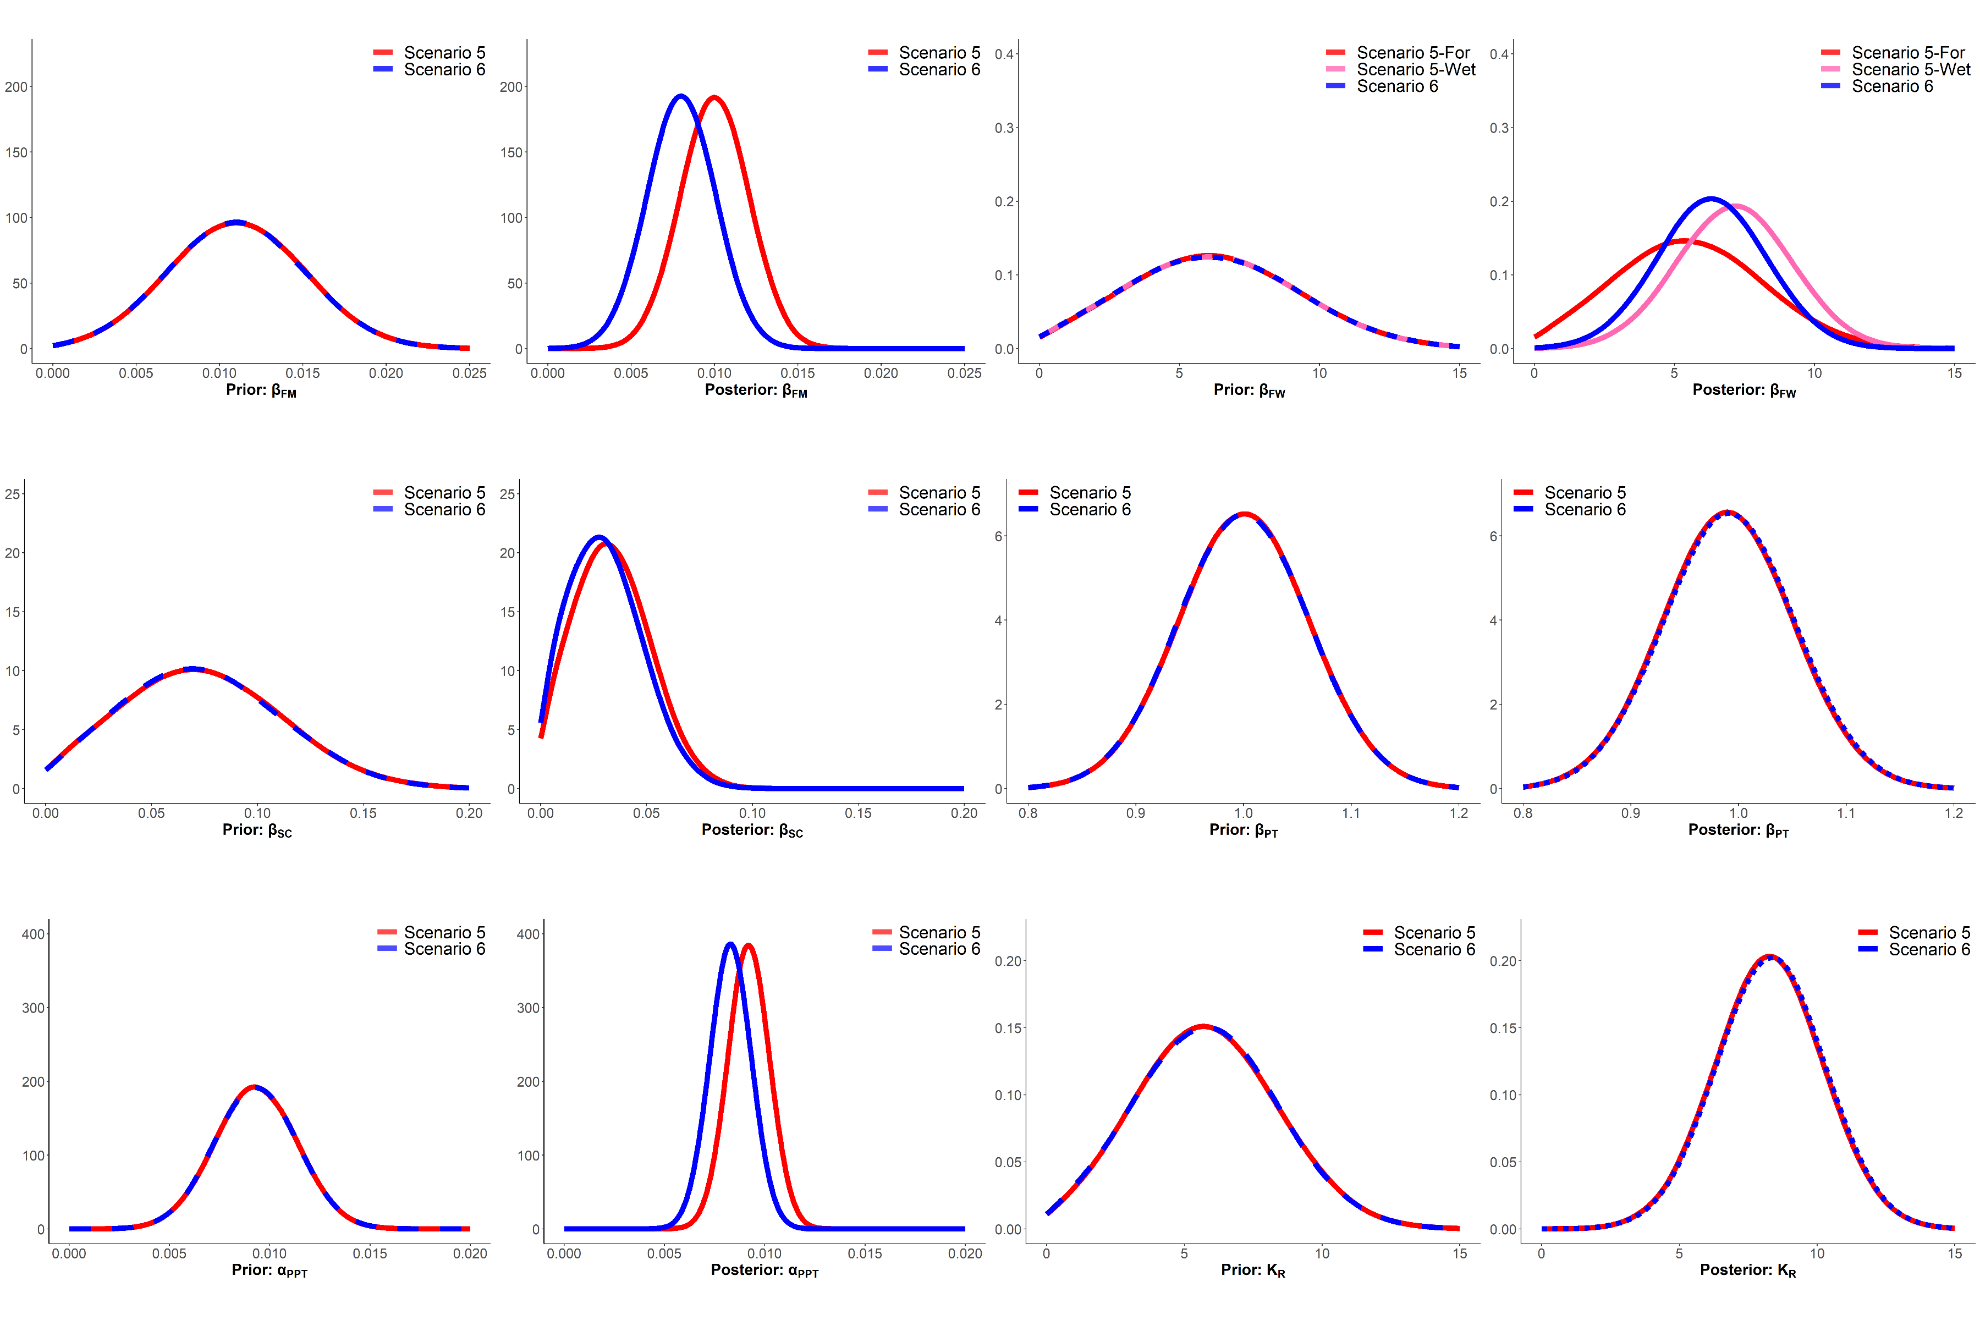


Figure S3. Probability density plots for parameter priors and posteriors of Scenarios 5 and 6.


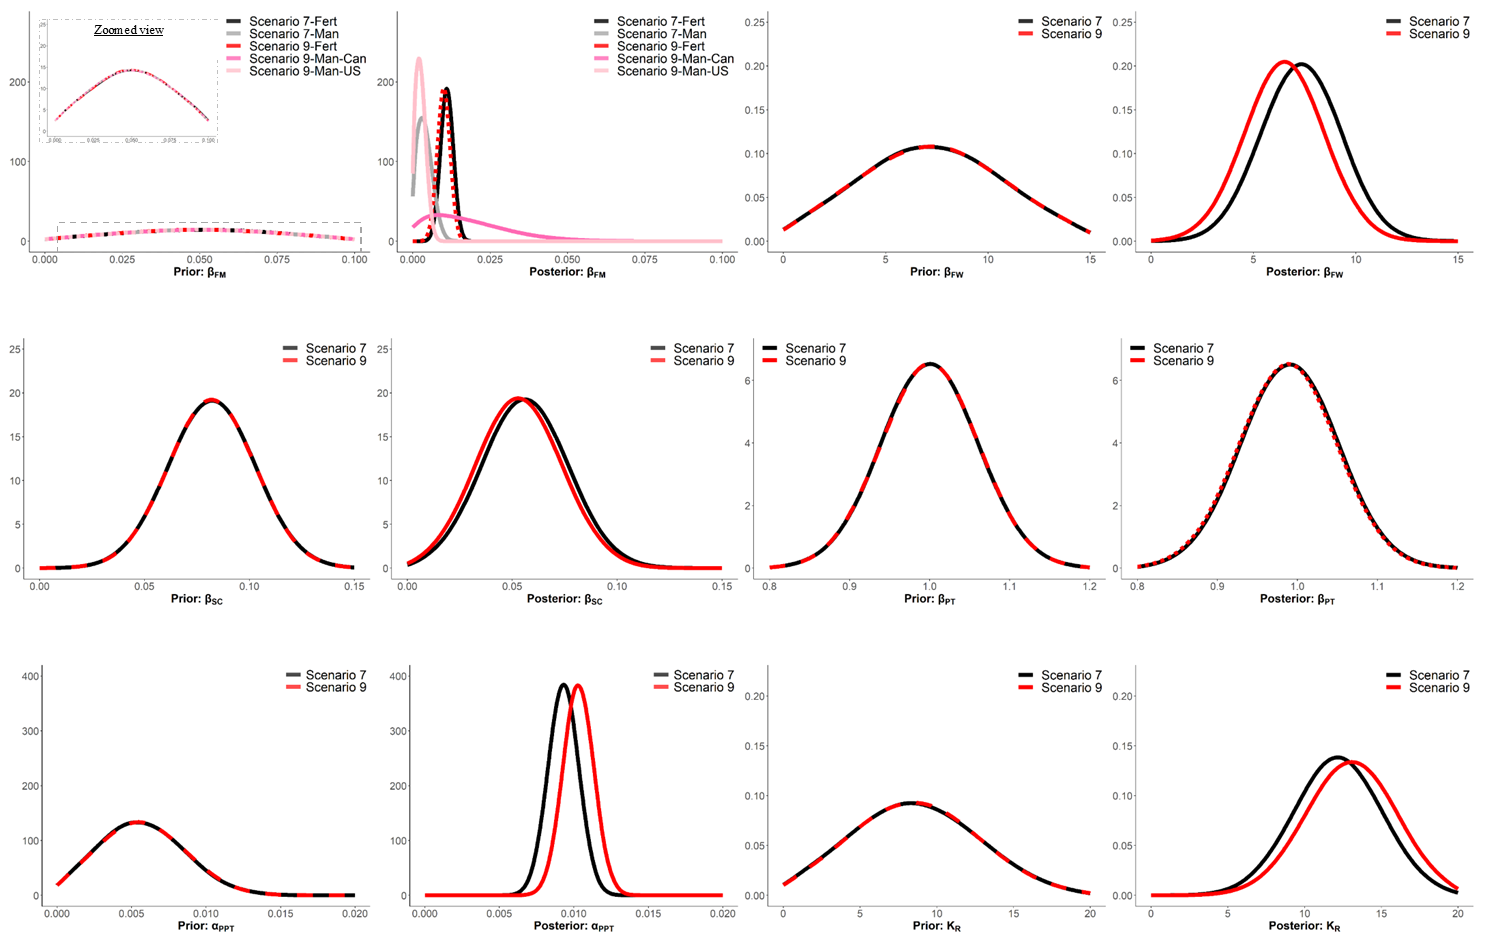


Figure S4. Probability density plots for parameter priors and posteriors of Scenarios 7 and 9.

Appendix S4. Tables of Loads and Yields for all non-key scenarios.

Table S5. Summary of loads and yields per major basin, province /state, and country for non-key scenarios.

|  |  | Aggregated  (Non-Decayed)  TP Load (MT/yr) | | | Delivered Aggregated  TP Load (MT/yr) | | | Aggregated TP  Yield (kg/km2) | | | Delivered Aggregated  TP Yield (kg/km²) | | | TP Delivery  Fraction | | |
| --- | --- | --- | --- | --- | --- | --- | --- | --- | --- | --- | --- | --- | --- | --- | --- | --- |
|  |  | Scen 3a-MARB | Scen 3b-MI | Scen 3c-Extr | Scen 3a-MARB | Scen 3b-MI | Scen 3c-Extr | Scen 3a-MARB | Scen 3b-MI | Scen 3c-Extr | Scen 3a-MARB | Scen 3b-MI | Scen 3c-Extr | Scen 3a-MARB | Scen 3b-MI | Scen 3c-Extr |
| **Major**  **(River)**  **Basin** | Red | 5,283 | 4,992 | 4,828 | 4,222 | 3,991 | 3,810 | 43.0 | 40.7 | 39.3 | 34.4 | 32.5 | 31.0 | 0.80 | 0.80 | 0.79 |
| Souris | 841 | 603 | 518 | 182 | 141 | 122 | 15.4 | 11.1 | 9.5 | 3.3 | 2.6 | 2.2 | 0.22 | 0.23 | 0.24 |
| Assiniboine | 1,082 | 825 | 716 | 362 | 286 | 241 | 25.4 | 19.4 | 16.8 | 8.5 | 6.7 | 5.6 | 0.33 | 0.35 | 0.34 |
| **Province**  **/State** | Manitoba | 2,738 | 2,249 | 1,955 | 2,028 | 1,711 | 1,476 | 45.7 | 37.6 | 32.7 | 33.9 | 28.6 | 24.7 | 0.74 | 0.76 | 0.75 |
| North Dakota | 2,062 | 1,832 | 1,756 | 1,483 | 1,379 | 1,336 | 29.7 | 26.4 | 25.3 | 21.4 | 19.9 | 19.2 | 0.72 | 0.75 | 0.76 |
| Minnesota | 1,548 | 1,684 | 1,769 | 1,144 | 1,222 | 1,263 | 34.0 | 37.0 | 38.9 | 25.1 | 26.8 | 27.7 | 0.74 | 0.73 | 0.71 |
| Saskatchewan | 791 | 582 | 507 | 85 | 76 | 67 | 18.1 | 13.3 | 11.6 | 1.9 | 1.7 | 1.5 | 0.11 | 0.13 | 0.13 |
| South Dakota | 67 | 74 | 76 | 26 | 30 | 31 | 49.0 | 53.7 | 55.2 | 18.9 | 21.6 | 22.3 | 0.39 | 0.40 | 0.40 |
| **Country** | Canada | 3,529 | 2,831 | 2,462 | 2,113 | 1,787 | 1,543 | 34.1 | 27.3 | 23.8 | 20.4 | 17.3 | 14.9 | 0.60 | 0.63 | 0.63 |
| US | 3,677 | 3,589 | 3,600 | 2,653 | 2,630 | 2,629 | 31.6 | 30.8 | 30.9 | 22.8 | 22.6 | 22.6 | 0.72 | 0.73 | 0.73 |
| **RARB** |  | 7,206 | 6,420 | 6,063 | 4,766 | 4,417 | 4,172 | 32.8 | 29.2 | 27.6 | 21.7 | 20.1 | 19.0 | 0.66 | 0.69 | 0.69 |

|  |  | Aggregated  (Non-Decayed)  TP Load (MT/yr) | | Delivered Aggregated  TP Load (MT/yr) | | Aggregated TP  Yield (kg/km2) | | Delivered Aggregated  TP Yield (kg/km²) | | TP Delivery  Fraction | |
| --- | --- | --- | --- | --- | --- | --- | --- | --- | --- | --- | --- |
|  |  | Scen 5 | Scen 6 | Scen 5 | Scen 6 | Scen 5 | Scen 6 | Scen 5 | Scen 6 | Scen 5 | Scen 6 |
| **Major**  **(River)**  **Basin** | Red | 4,725 | 4,759 | 3,916 | 3,934 | 38.5 | 38.8 | 32.0 | 32.1 | 0.83 | 0.83 |
| Souris | 460 | 473 | 128 | 135 | 8.4 | 8.7 | 2.4 | 2.5 | 0.28 | 0.29 |
| Assiniboine | 681 | 656 | 277 | 273 | 16.0 | 15.4 | 6.5 | 6.4 | 0.41 | 0.42 |
| **Province**  **/State** | Manitoba | 1,971 | 1,871 | 1,601 | 1,519 | 33.0 | 31.3 | 26.7 | 25.4 | 0.81 | 0.81 |
| North Dakota | 1,678 | 1,773 | 1,333 | 1,392 | 24.1 | 25.6 | 19.2 | 20.0 | 0.79 | 0.79 |
| Minnesota | 1,680 | 1,750 | 1,262 | 1,316 | 36.9 | 38.5 | 27.8 | 29.0 | 0.75 | 0.75 |
| Saskatchewan | 465 | 432 | 90 | 85 | 10.6 | 9.9 | 2.1 | 2.0 | 0.19 | 0.20 |
| South Dakota | 72 | 64 | 34 | 30 | 52.8 | 47.0 | 25.1 | 21.8 | 0.48 | 0.46 |
| **Country** | Canada | 2,436 | 2,303 | 1,691 | 1,604 | 23.5 | 22.2 | 16.3 | 15.5 | 0.69 | 0.70 |
| US | 3,430 | 3,586 | 2,630 | 2,738 | 29.5 | 30.9 | 22.6 | 23.5 | 0.77 | 0.76 |
| **RARB** |  | 5,866 | 5,888 | 4,322 | 4,342 | 26.6 | 26.8 | 19.6 | 19.7 | 0.74 | 0.74 |

|  |  | Aggregated  (Non-Decayed)  TP Load (MT/yr) | | Delivered Aggregated  TP Load (MT/yr) | | Aggregated TP  Yield (kg/km2) | | Delivered Aggregated  TP Yield (kg/km²) | | TP Delivery  Fraction | |
| --- | --- | --- | --- | --- | --- | --- | --- | --- | --- | --- | --- |
|  |  | Scen 7 | Scen 9 | Scen 7 | Scen 9 | Scen 7 | Scen 9 | Scen 7 | Scen 9 | Scen 7 | Scen 9 |
| **Major**  **(River)**  **Basin** | Red | 5,018 | 5,588 | 4,087 | 4,593 | 40.9 | 45.5 | 33.3 | 37.5 | 0.81 | 0.82 |
| Souris | 514 | 578 | 128 | 138 | 9.4 | 10.6 | 2.4 | 2.5 | 0.25 | 0.24 |
| Assiniboine | 757 | 864 | 282 | 325 | 17.8 | 20.3 | 6.6 | 7.6 | 0.37 | 0.38 |
| **Province**  **/State** | Manitoba | 2,092 | 2,840 | 1,642 | 2,257 | 35.0 | 47.5 | 27.4 | 37.7 | 0.79 | 0.79 |
| North Dakota | 1,894 | 1,813 | 1,472 | 1,415 | 27.2 | 26.1 | 21.1 | 20.3 | 0.78 | 0.78 |
| Minnesota | 1,724 | 1,730 | 1,281 | 1,274 | 37.9 | 38.1 | 28.1 | 28.0 | 0.74 | 0.74 |
| Saskatchewan | 522 | 590 | 78 | 84 | 11.9 | 13.5 | 1.8 | 1.9 | 0.15 | 0.14 |
| South Dakota | 58 | 57 | 25 | 25 | 42.2 | 41.8 | 18.4 | 18.0 | 0.44 | 0.43 |
| **Country** | Canada | 2,614 | 3,430 | 1,720 | 2,341 | 25.2 | 33.2 | 16.6 | 22.6 | 0.66 | 0.68 |
| US | 3,676 | 3,600 | 2,778 | 2,715 | 31.6 | 31.0 | 23.8 | 23.3 | 0.76 | 0.75 |
| **RARB** |  | 6,290 | 7,030 | 4,498 | 5,056 | 28.6 | 32.0 | 20.4 | 23.0 | 0.72 | 0.72 |

Appendix S5. Delivered aggregated yields maps per sub-sub-drainage area for all non-key scenarios.

| 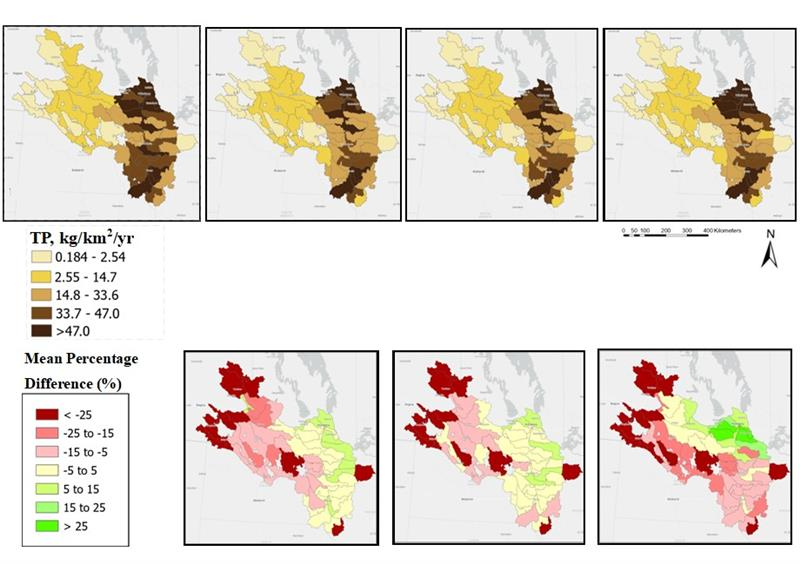 | 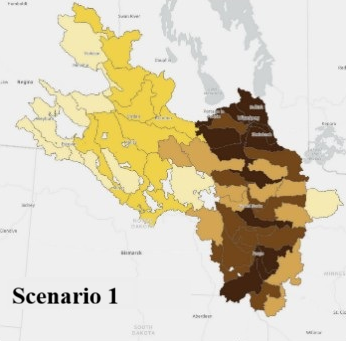 | 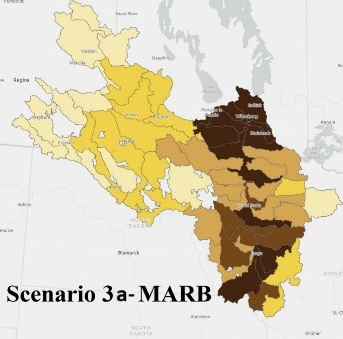 | 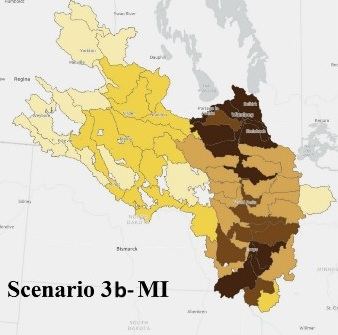 | 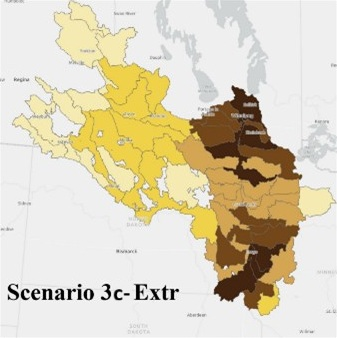 |
| --- | --- | --- | --- | --- |
|  |  | 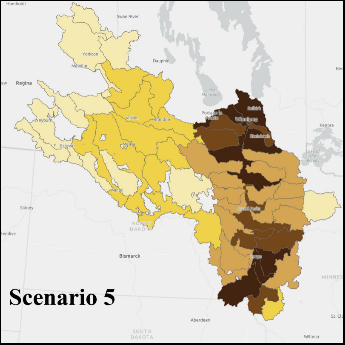 | 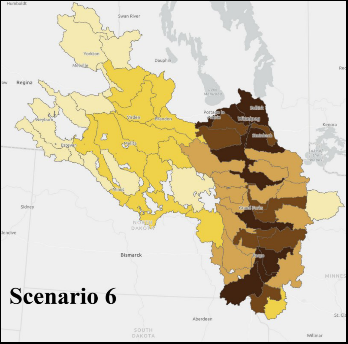 |  |
|  |  | 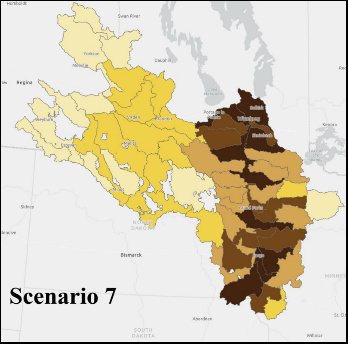 | 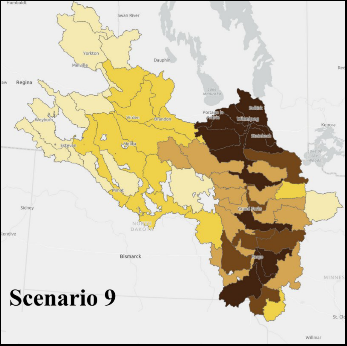 |  |

Figure S5. Delivered aggregated yields for sub-sub-drainage areas for non-key scenarios.

Appendix S6. Hotspots – Canada then US – Yields per Sub-Sub-Drainage Area (kg/km²/yr).

Table S6. Canadian delivered yield hotspot values (kg/km²/yr). Rows sorted using Scenario 8.

| **Major Basin** | **Sub-Sub-Drainage Area** | **Scenario 1** | **Scenario 2** | **Scenario 3d-FS** | **Scenario 4** | **Scenario 8** |
| --- | --- | --- | --- | --- | --- | --- |
| Red | Lower Red | 89.5 | 87.3 | 86.8 | 88.2 | 97.6 |
| Red | Rat and Tourond | 62.8 | 58.1 | 56.8 | 51.3 | 82.6 |
| Red | Upper Red (Canada) | 65.2 | 59.4 | 58.7 | 62.9 | 71.6 |
| Red | Seine | 47.0 | 43.0 | 41.6 | 37.4 | 59.4 |
| Assiniboine | Lower Assiniboine - Mouth | 51.2 | 48.8 | 49.7 | 49.1 | 58.4 |
| Red | Morris | 47.5 | 40.5 | 42.0 | 43.3 | 58.4 |
| Red | La Salle | 43.3 | 37.4 | 38.3 | 39.5 | 52.6 |


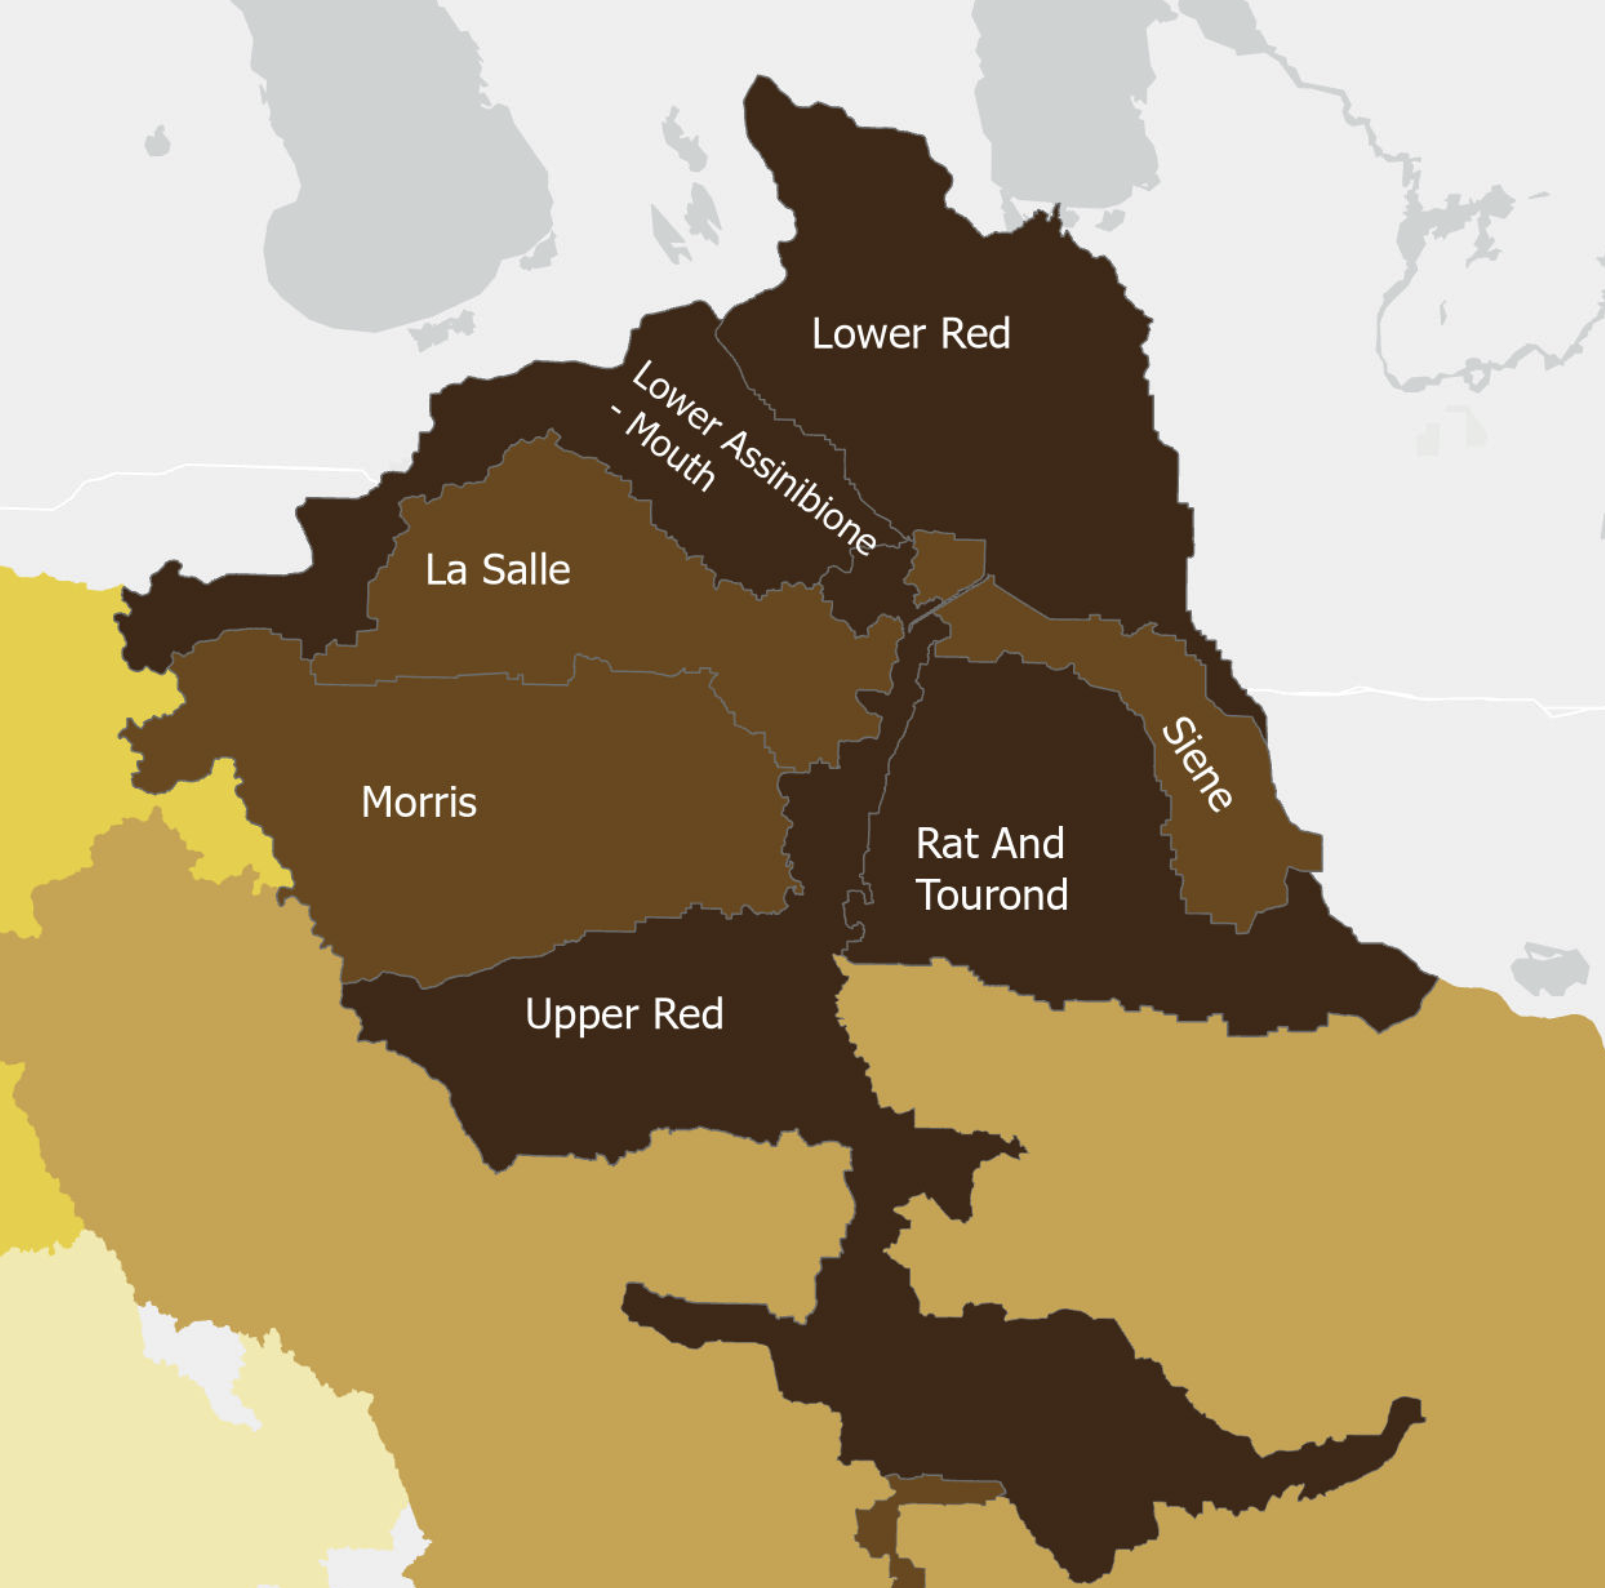


Figure S6. Canadian delivered yield hotspot map. Color rendering uses average yield across four key scenarios where darker brown is higher yield.

Table S7. U.S. delivered yield hotspot values (kg/km²/yr). Rows sorted using Scenario 8.

| **Major Basin** | **Sub-Sub-Drainage Area** | **Scenario 1** | **Scenario 2** | **Scenario 3d-FS** | **Scenario 4** | **Scenario 8** |
| --- | --- | --- | --- | --- | --- | --- |
| Red | Upper Red (US) | 96.8 | 89.8 | 89.3 | 93.0 | 90.3 |
| Red | Buffalo | 69.3 | 61.8 | 60.7 | 61.5 | 62.9 |
| Red | Western Wild Rice | 66.9 | 58.8 | 55.1 | 62.6 | 55.6 |
| Red | Sandhill-Wilson | 50.3 | 44.9 | 46.5 | 48.0 | 45.0 |
| Red | Eastern Wild Rice | 45.2 | 39.9 | 39.7 | 40.2 | 40.4 |
| Red | Bois De Sioux | 35.2 | 40.4 | 39.0 | 42.5 | 38.8 |
| Red | Elm-Marsh | 44.0 | 37.7 | 38.2 | 42.0 | 36.8 |
| Red | Grand Marais-Red | 40.3 | 35.0 | 36.1 | 37.0 | 34.1 |


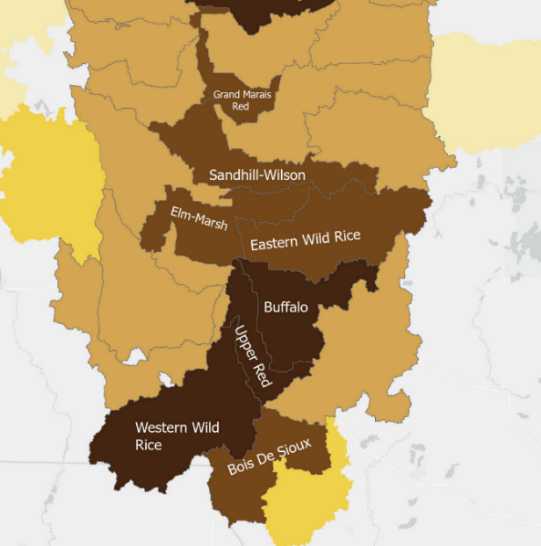


Figure S7. U.S. delivered yield hotspot map. Color rendering uses average yield across four key scenarios where darker brown is higher yield.

**References:**

1. Smith, R. A., Schwarz, G. E. & Alexander, R. B. Regional interpretation of water-quality monitoring data. *Water Resour. Res.* **33**, 2781–2798 (1997).

2. Schwarz, G. E., Hoos, A. B., Alexander, R. B. & Smith, R. A. *The* SPARROW surface water-quality model: theory, application and user documentation. (2006).

3. Jenkinson, R. & Benoy, G. Red-Assiniboine Basin SPARROW model development technical document. *National Research Council of Canada, Ottawa, ON* 65 (2015).

4. Robertson, D. M. *et al.* Phosphorus and nitrogen transport in the binational Great Lakes basin estimated using SPARROW watershed models. *J. Am. Water Resour. Assoc* https://doi.org/10.1111/1752-1688.12792 (2019) doi:10.1111/1752-1688.12792.

5. Qian, S. S., Reckhow, K. H., Zhai, J. & McMahon, G. Nonlinear regression modeling of nutrient loads in streams: A Bayesian approach. *Water Resources Research* **41**, 2005WR003986 (2005).

6. Wellen, C., Kamran-Disfani, A.-R. & Arhonditsis, G. B. Evaluation of the current state of distributed watershed nutrient water quality modelling. *Environ. Sci. Technol.* **49**, 3278–3290 (2015).

7. Benoy, G. A., Jenkinson, R. W., Robertson, D. M. & Saad, D. A. Nutrient delivery to Lake Winnipeg from the Red—Assiniboine River Basin – A binational application of the SPARROW model. *Canadian Water Resources Journal / Revue canadienne des ressources hydriques* **41**, 429–447 (2016).

8. Robertson, D. M. & Saad, D. A. SPARROW models used to understand nutrient sources in the Mississippi/Atchafalaya River Basin. *Journal of Environmental Quality* **42**, 1422–1440 (2013).

9. Robertson, D. M. & Saad, D. A. Nutrient inputs to the Laurentian Great Lakes by source and watershed estimated using SPARROW watershed Models. *JAWRA J. Am. Water Resour. Assoc* **47**, 1011–1033 (2011).

10. Rattan, K., Blukacz-Richards, E., Yates, A., Culp, J. & Chambers, P. Hydrological variability affects particulate nitrogen and phosphorus in streams of the Northern Great Plains. *Journal of Hydrology: Regional Studies* **21**, 110–125 (2019).

11. Harmel, R. D. *et al.* Updates to the MANAGE database to facilitate regional analyses of nutrient runoff. *Agricultural & Env. Letters* **7**, e20095 (2022).

12. Kim, D.-K. *et al.* A Bayesian approach for estimating phosphorus export and delivery rates with the SPAtially Referenced Regression On Watershed attributes (SPARROW) model. *Ecol. Inform* **37**, 77–91 (2017).

13. Bourne, A., Armstrong, N. & Jones, G. *A* preliminary estimate of total nitrogen and total phosphorus loading to streams in Manitoba, Canada. https://www.gov.mb.ca/sd/pubs/water/lakes-beaches-rivers/nutrient_loading_report_2002-04_november_2002.pdf (2002).

14. Neumann, A., Blukacz-Richards, E. A., Saha, R., Alberto Arnillas, C. & Arhonditsis, G. B. A Bayesian hierarchical spatially explicit modelling framework to examine phosphorus export between contrasting flow regimes. *Journal of Great Lakes Research* S0380133022002301 (2022) doi:10.1016/j.jglr.2022.10.003.

15. Neumann, A., Blukacz-Richards, E. A., Yao, H., James, A. L. & Arhonditsis, G. B. An ensemble of Bayesian SPARROW models for the Precambrian Shield in the eastern Georgian Bay drainage basin, Ontario, Canada. *Journal of Great Lakes Research* **47**, 1671–1688 (2021).

16. Baulch, H. M. *et al.* Soil and water management: opportunities to mitigate nutrient losses to surface waters in the Northern Great Plains. *Environ. Rev.* **27**, 447–477 (2019).
